# Supplementary material for: In Vitro Macrophage Assay Predicts the In Vivo Anti-inflammatory Potential of Exosomes from Human Mesenchymal Stromal Cells
Source: PubMed Central journal article supplement — Mol Ther Methods Clin Dev. 2018 Dec 15;13:67–76. doi: 10.1016/j.omtm.2018.12.003 (PMC6350420; doi:10.1016/j.omtm.2018.12.003), 2018-12-15
Supplement: mmc1.pdf [file mmc1.pdf]

OMTM, Volume 13

## Supplemental Information

***In Vitro* Macrophage Assay Predicts the *In Vivo***

**Anti-inflammatory Potential of Exosomes**

**from Human Mesenchymal Stromal Cells**

**Natalia Pacienza, Ryang Hwa Lee, Eun-Hye Bae, Dong-ki Kim, Qisong Liu, Darwin J. Prockop, and Gustavo Yannarelli**

## SUPPLEMENTAL INFORMATION

**Table S1. Applied Biosystem TaqMan gene expression assay information**

| <b>Gene symbol</b> | <b>Unigene ID</b> | <b>Assay ID</b> |
|--------------------|-------------------|-----------------|
| GAPDH              | Mm.304088         | Mm99999915_g1   |
| TNF- $\alpha$      | Mm.1293           | Mm00443258_m1   |
| IL-1 $\beta$       | Mm.222830         | Mm00434228_m1   |
| IL-6               | Mm.1019           | Mn00446190_m1   |
| iNOS               | Mm.2893           | Mm00440502_m1   |
| Arg1               | Mm.154144         | Mn00475988_m1   |

**Figure S1.**

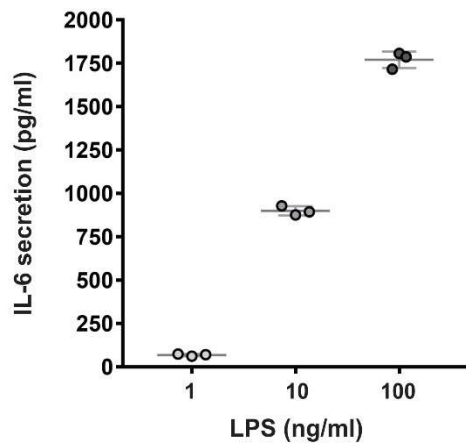

**Figure S1. Interleukin-6 secretion in conditioned media of macrophages activated with different doses of LPS.** RAW264.7 macrophages were treated with 1, 10 or 100 ng/ml of LPS and conditioned media was collected after 4 h. Interleukin-6 in conditioned media was determined by ELISA. Data represent mean  $\pm$  SD (n=3).

Figure S2.

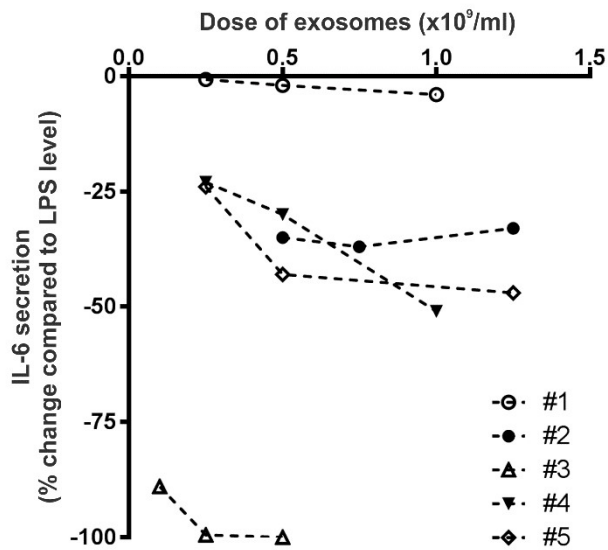

**Figure S2. Dose-response data for different exosomes preparations.** The anti-inflammatory activity of MSC-derived exosomes was determined by testing different doses of each preparation in the macrophage assay. Results are expressed as percentage of change of IL-6 secretion in conditioned media relative to LPS-stimulated levels. Samples identified as in Table 1. A dose of  $0.5 \times 10^9$  vesicles/ml was selected as the more appropriate to categorize the anti-inflammatory potential of the different preparations and was used for all the subsequent experiments.

Figure S3.

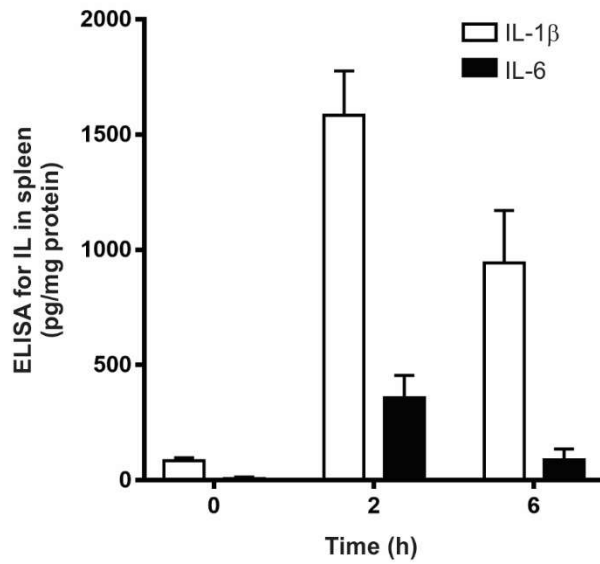

**Figure S3. Time-course expression of the pro-inflammatory cytokines IL-1 $\beta$  and IL-6 in spleen in a mouse model of systemic inflammation.** LPS (2.5 mg/kg) was administered i.v. and the expression of IL-1 $\beta$  and IL-6 was assessed by ELISA in spleen lysates at 0, 2, and 6 h. Data represent mean  $\pm$  SD (n=4 per time point).
